# Supplementary material
Source: PubMed Central journal article supplement (PMC2154479)

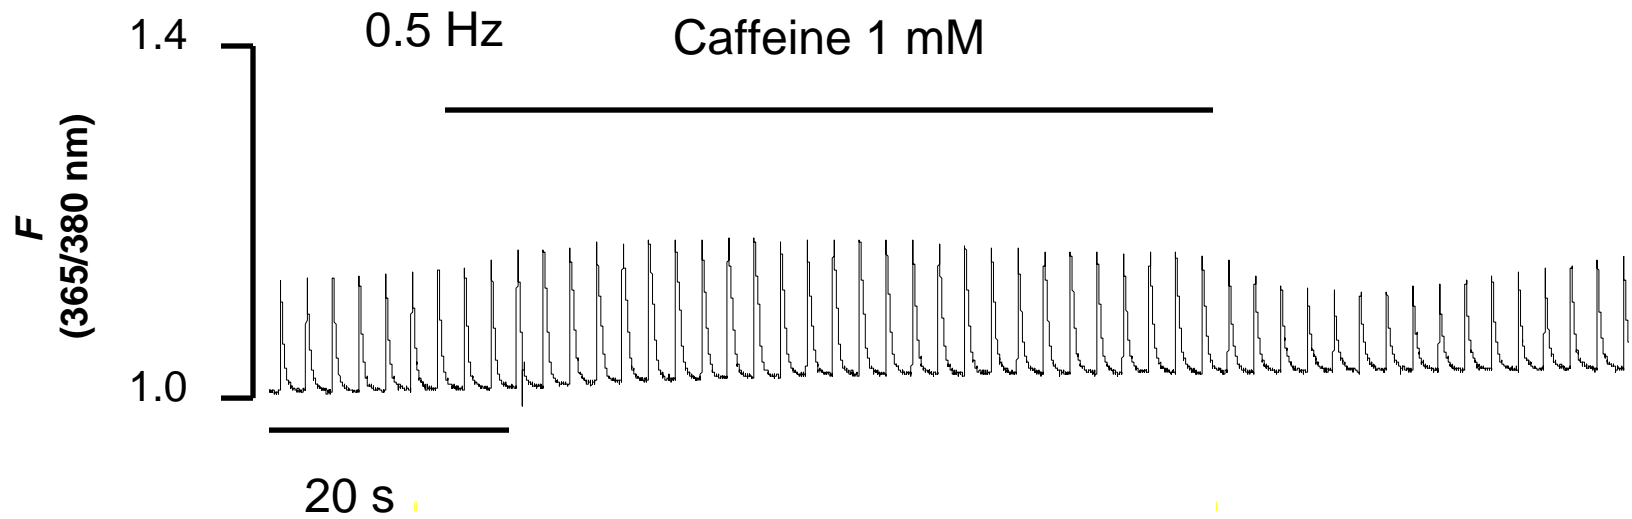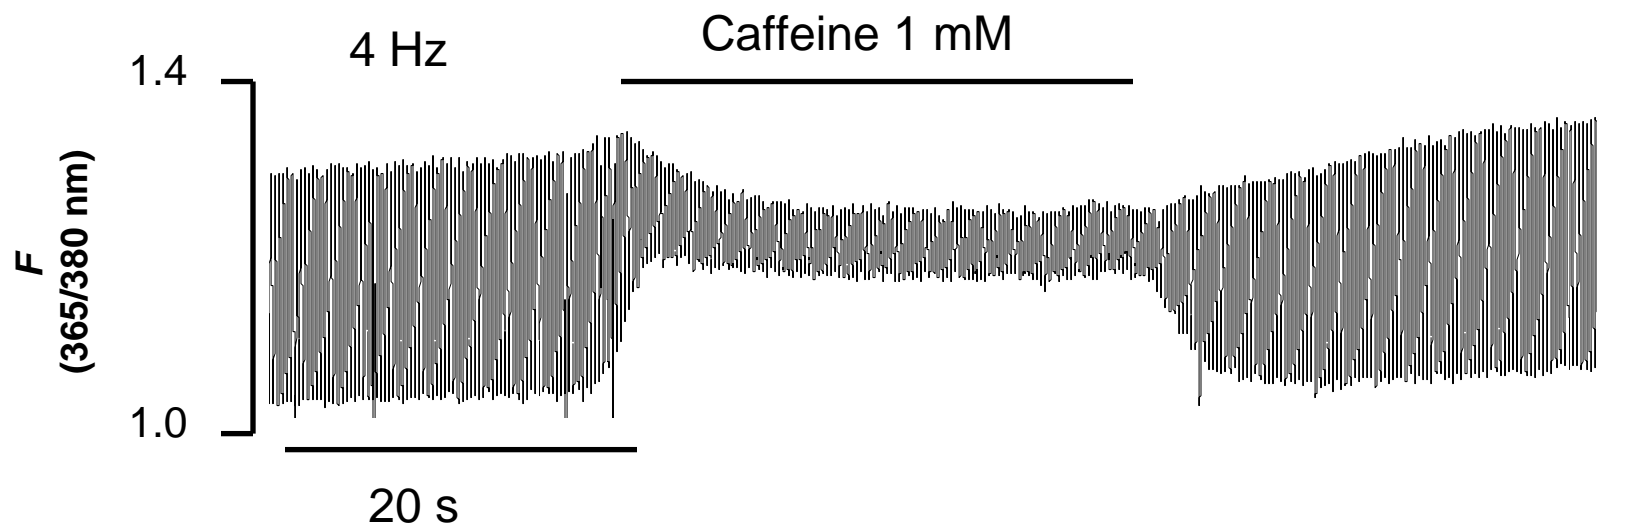

Supplement: supp_0706796104_06796Fig7.pdf [file supp_0706796104_06796Fig7.pdf]

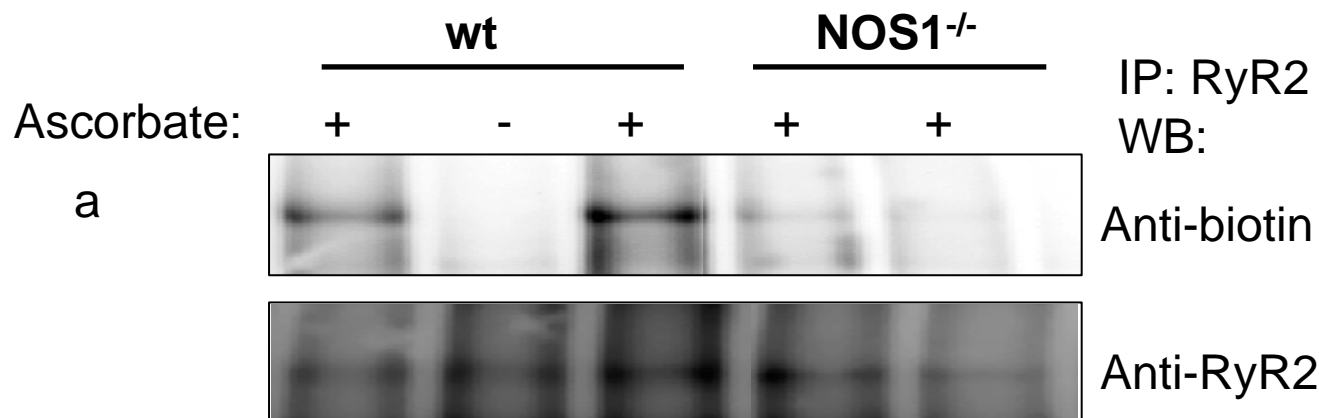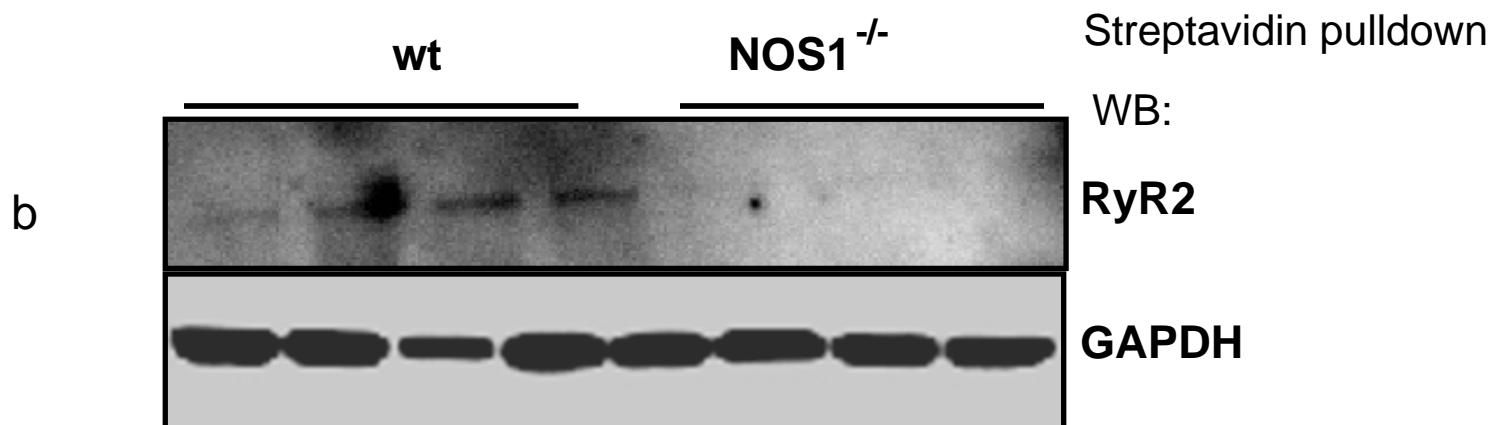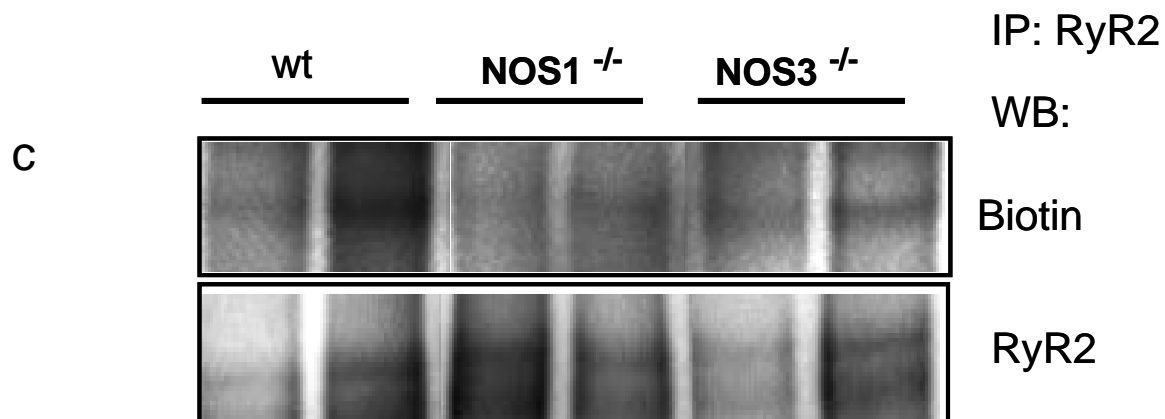

Supplement: supp_0706796104_06796Fig8.pdf [file supp_0706796104_06796Fig8.pdf]

wt

NOS3<sup>-/-</sup>

mB-bimane

silver stain

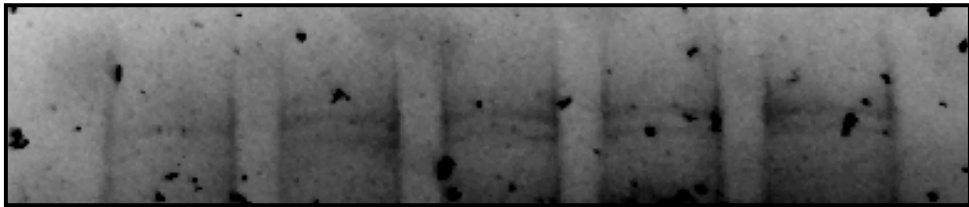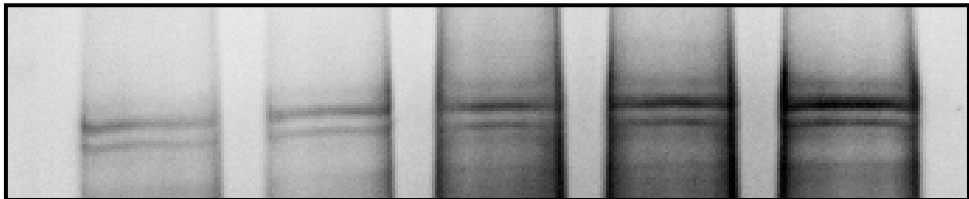

Supplement: supp_0706796104_06796Fig9.pdf [file supp_0706796104_06796Fig9.pdf]
